# Supplementary material for: Enhancing the Representation of Glaciers and Ice Sheets in the ecLand Land-Surface Model: Impacts on Surface Energy Balance and Hydrology Across Scales
Source: Copernicus journal article supplement (doi:10.5194/tc-20-1119-2026), 2026-02-12
Supplement: Supplementary file 1 [file tc-20-1119-2026-supplement.pdf]

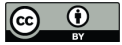

*Supplement of*

## **Enhancing the Representation of Glaciers and Ice Sheets in the ecLand Land-Surface Model: Impacts on Surface Energy Balance and Hydrology Across Scales**

**Gabriele Arduini et al.**

*Correspondence to:* Gabriele Arduini ([gabriele.arduini@ecmwf.int](mailto:gabriele.arduini@ecmwf.int))

The copyright of individual parts of the supplement might differ from the article licence.

Table S1: Summary of experimental setups for (a) PROMICE point-scale simulations and (b) global 2D simulations. See Sect. 2.4.1 for a detailed description of the experimental setups.

| Label                                  | Experiment setting       | Forcing (Met. variables)                                                                   | Glacier mask ( $f_{gl}$ )                 | Horizontal resolution                              | Spin-up                                                 |
|----------------------------------------|--------------------------|--------------------------------------------------------------------------------------------|-------------------------------------------|----------------------------------------------------|---------------------------------------------------------|
| <b>(a) Point-scale (PROMICE sites)</b> |                          |                                                                                            |                                           |                                                    |                                                         |
| CTL-OBS                                | Baseline control         | In situ (T, q, wind speed/dir, $p_s$ , SW↓, LW↓); ERA5 solid+liquid precip.; ERA5 gap-fill | 1.0                                       | Point scale                                        | Site period repeated until $\geq 30$ yr, then final run |
| GLA-OBS                                | Glacier parameterisation | Same as CTL-OBS                                                                            | 1.0                                       | Point scale                                        | Same as CTL-OBS                                         |
| CTL-E5                                 | Baseline control         | ERA5 (all variables)                                                                       | 1.0                                       | Point scale                                        | Same strategy as CTL-OBS                                |
| GLA-E5                                 | Glacier parameterisation | ERA5 (all variables)                                                                       | 1.0                                       | Point scale                                        | Same strategy as CTL-OBS                                |
| CTL-E5-CLIM                            | Baseline control         | ERA5 (all variables)                                                                       | Nearest neighbour operational mask (9 km) | Point scale                                        | Same strategy as CTL-OBS                                |
| GLA-E5-CLIM                            | Glacier parameterisation | ERA5 (all variables)                                                                       | Nearest neighbour operational mask (9 km) | Point scale                                        | Same strategy as CTL-OBS                                |
| <b>(b) Global 2D simulations)</b>      |                          |                                                                                            |                                           |                                                    |                                                         |
| CTL (global)                           | Baseline control         | ERA5 conservatively regridded                                                              | Fractional mask (operational)             | ecLand: $\sim 14$ km (TCo799); CamaFlood: 15arcmin | 20 yr (1970–1989) spin-up; analysis from 1990           |
| GLA (global)                           | Glacier parameterisation | ERA5 conservatively regridded                                                              | Same (fractional, glacier tile)           | ecLand: $\sim 14$ km (TCo799); CamaFlood: 15arcmin | Same as CTL (global)                                    |

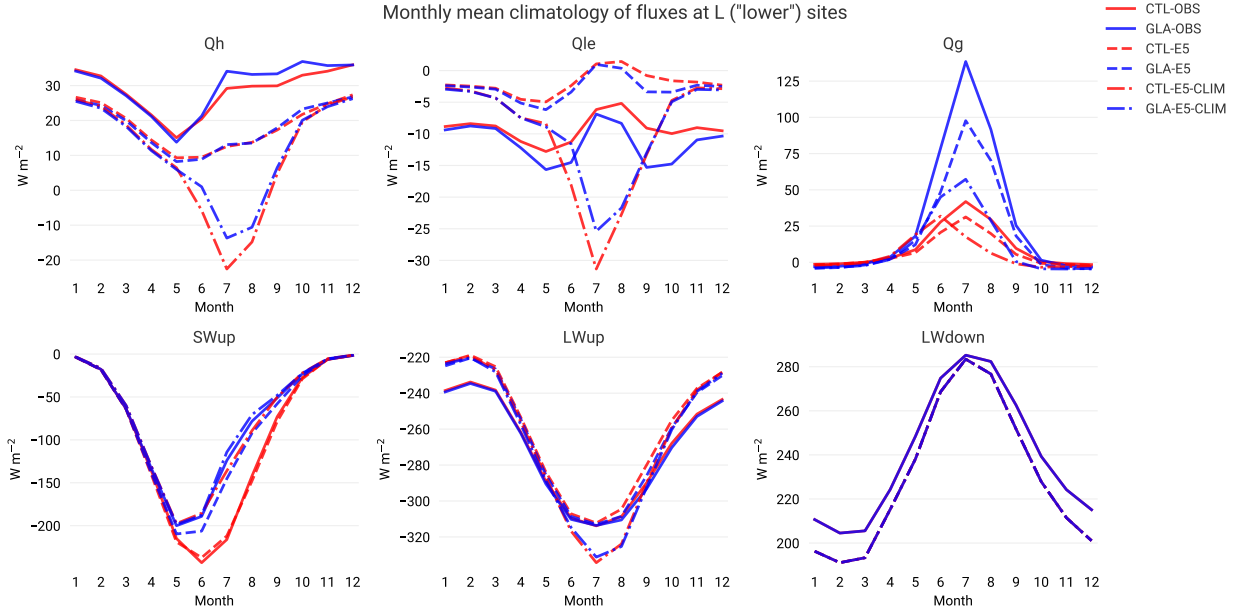

Figure S1: Mean annual climatology of modelled surface energy balance components at the *lower* sites, from ecLand CTL with in situ forcing (CTL-OBS), and with ERA5 forcing (CTL-ERA5) and with ERA5 forcing and ECMWF's operational glacier mask (CTL-ERA5-CLIM) and ecLand with the new glacier parameterisation (GLA-OBS, GLA-ERA5 and GLA-ERA5-CLIM for in situ, ERA5 forcing and ECMWF's operational glacier mask, respectively). Qh: sensible heat flux; Qle: latent heat flux; Qg: snow heat flux; SWup: reflected shortwave radiation; LWup: emitted longwave radiation; LWdown: incoming longwave radiation. Note the different y-axis scales for the different fluxes. See Sect. 2.4.1 of the main text and Table S1 for details on the different experiment setups

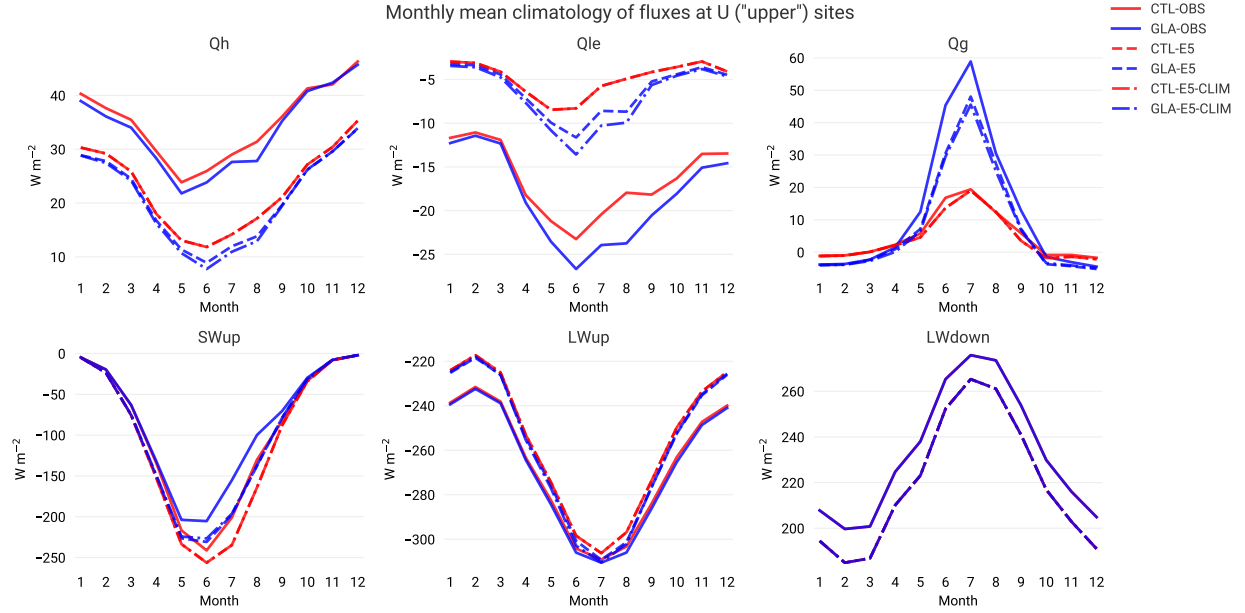

Figure S2: Mean annual climatology of modelled surface energy balance components at the *upper* sites, from ecLand CTL with in situ forcing (CTL-OBS), and with ERA5 forcing (CTL-ERA5) and with ERA5 forcing and ECMWF's operational glacier mask (CTL-ERA5-CLIM) and ecLand with the new glacier parameterisation (GLA-OBS, GLA-ERA5 and GLA-ERA5-CLIM for in situ, ERA5 forcing and ECMWF's operational glacier mask, respectively). Qh: sensible heat flux; Qle: latent heat flux; Qg: snow heat flux; SWup: reflected shortwave radiation; LWup: emitted longwave radiation; LWdown: incoming longwave radiation. Note the different y-axis scales for the different fluxes. See Sect. 2.4.1 of the main text and Table S1 for details on the different experiment setups

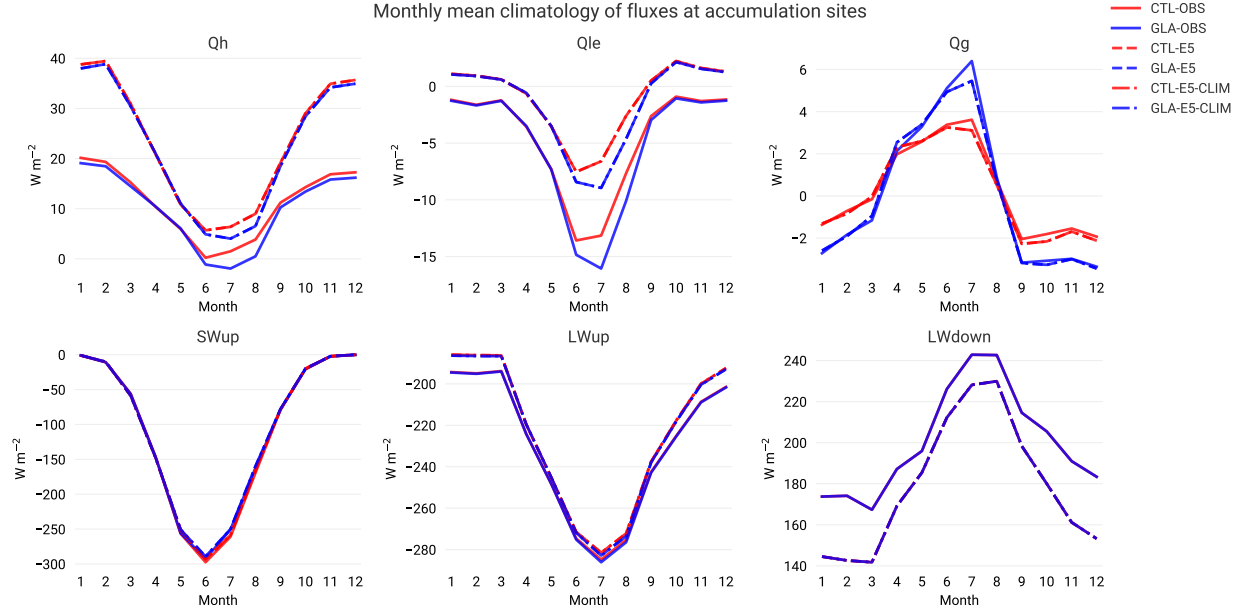

Figure S3: Mean annual climatology of modelled surface energy balance components at the *accumulation* sites, from ecLand CTL with in situ forcing (CTL-OBS), and with ERA5 forcing (CTL-ERA5) and with ERA5 forcing and ECMWF’s operational glacier mask (CTL-ERA5-CLIM) and ecLand with the new glacier parameterisation (GLA-OBS, GLA-ERA5 and GLA-ERA5-CLIM for in situ, ERA5 forcing and ECMWF’s operational glacier mask, respectively). Qh: sensible heat flux; Qle: latent heat flux; Qg: snow heat flux; SWup: reflected shortwave radiation; LWup: emitted longwave radiation; LWdown: incoming longwave radiation. Note the different y-axis scales for the different fluxes. See Sect. 2.4.1 of the main text and Table S1 for details on the different experiment setups

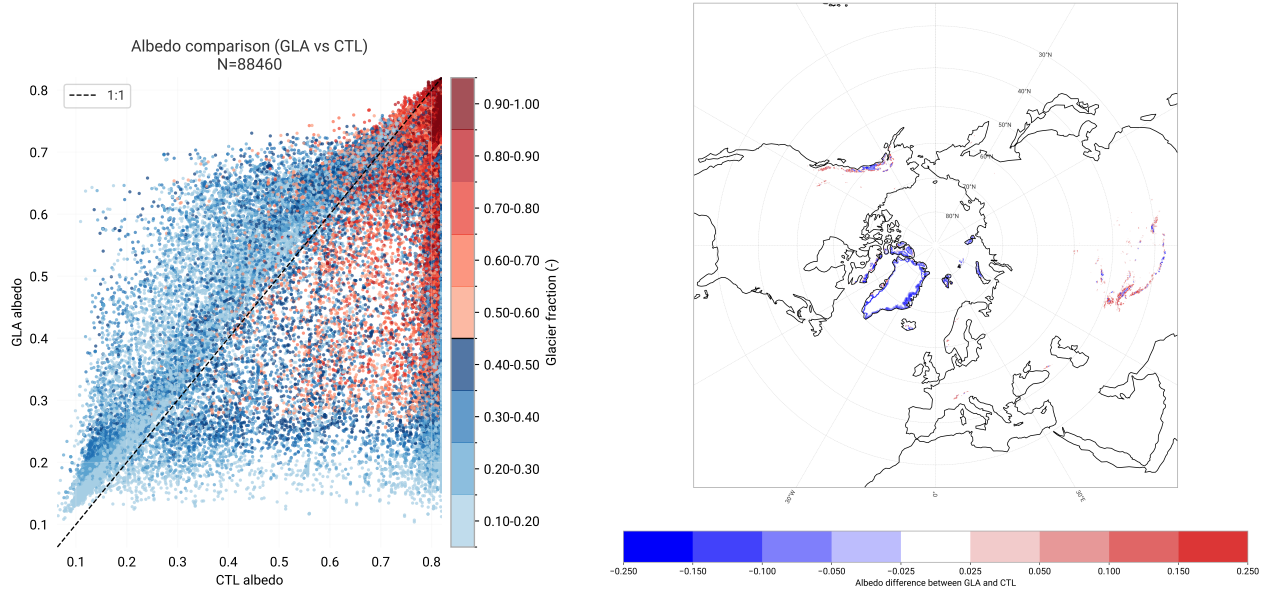

Figure S4: Left: Scatter plot of the daily and grid-box averaged surface albedo for CTL (x-axis) and GLA (y-axis) experiments, for grid points with a non-zero fraction of ice in a grid cell, for the June to August months from 2000 to 2019. Each point indicate The 1:1 line is shown in black. Right: Composite surface albedo differences between GLA and CTL experiments, for the June to August months between 2000 and 2019.
